## Efficient querying of genomic reference databases with *gget*

Laura Luebbert<sup>1</sup> and Lior Pachter<sup>1,2,\*</sup>

- 1 Division of Biology and Biological Engineering, California Institute of Technology, Pasadena, California
- 2 Department of Computing and Mathematical Sciences, California Institute of Technology, Pasadena, California
- \* Address correspondence to [lpachter@caltech.edu](mailto:lpachter@caltech.edu).

### Abstract

**Motivation:** A recurring challenge in interpreting genomic data is the assessment of results in the context of existing reference databases. Currently, there is no tool implementing automated, easy programmatic access to curated reference information stored in a diverse collection of large, public genomic databases.

**Results:** *gget* is a free and open-source command-line tool and Python package that enables efficient querying of genomic reference databases, such as Ensembl. *gget* consists of a collection of separate but interoperable modules, each designed to facilitate one type of database querying required for genomic data analysis in a single line of code.

**Availability:** The manual and source code are available at <https://github.com/pachterlab/gget>.

**Contact:** [lpachter@caltech.edu](mailto:lpachter@caltech.edu)

### Introduction

The increasingly common use of genomic methods, such as single-cell RNA-seq, to provide transcriptomic characterization of cells is dependent on quick and easy access to reference information stored in large genomic databases such as Ensembl, NCBI, and UniProt (Cunningham *et al.*, 2022; NCBI Resource Coordinators, 2013; UniProt Consortium, 2021). Although integrated information retrieval systems date back to the 1990s (Etzold *et al.*, 1996; Zdobnov *et al.*, 2002), a majority of researchers currently access genomic reference databases to annotate and functionally characterize putative marker genes through web access (Stalker *et al.*, 2004; Birney *et al.*, 2004). This process is time-consuming and error-prone, as it requires manually copying and pasting data, such as gene IDs.

To facilitate and automate functional annotation for genomic data analyses, we developed *gget*: a free and open-source software package that rapidly queries information stored in several large, public databases directly from a command line or Python environment. *gget* consists of a collection of tools designed to perform the database querying required for genomic data analysis in a single line of code. In addition to providing access to genomic databases, *gget* can also leverage sequence analysis tools, such as BLAST (Altschul *et al.*, 1990, 1997), thus simplifying complex annotation workflows.

While there are some web-based Application Programming Interface (API) data mining systems, such as BioMart (Durinck *et al.*, 2005; Kasprzyk *et al.*, 2004), we identified several limitations in such tools, including limits to query types and to utilizing databases in tandem. Moreover, large-scale genomic data analyses, such as single-cell RNA-seq data analysis, are better served by command line or packaged APIs that can fetch data directly into programming environments.

The *gget* modules combine MySQL (Oracle Corporation, 1995), API, and web data extraction queries to rapidly and reliably request comprehensive information from different databases (Figure 1). This approach allows *gget* to perform tasks unsupported by existing tools built around standard API queries (de Ruiter, 2016). For instance, searching for genes and transcripts using free-form search terms. Each *gget* tool requires minimal arguments, provides clear output, and operates from both the command line and Python environments, such as JupyterLab, maximizing ease of use and accommodating novice programmers.

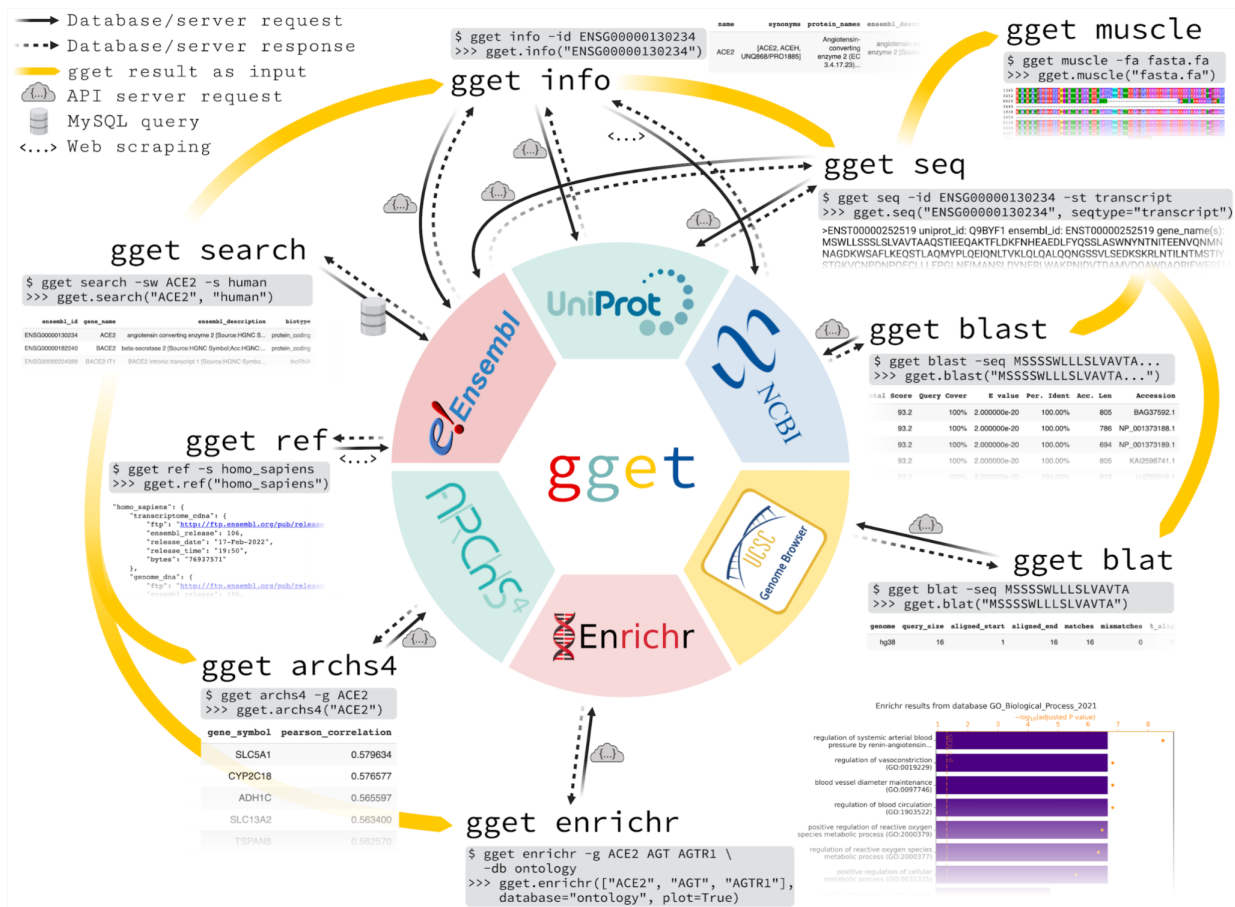

**Figure 1** Overview of the nine *gget* tools and the public databases they access. One simple command line (\$) example and its Python (>>>) equivalent are shown for each tool with the corresponding output.

## Description

*gget* consists of nine tools:

- *gget ref*: Fetch File Transfer Protocols (FTPs) and metadata for reference genomes or annotations from Ensembl by species.
- *gget search*: Fetch genes or transcripts from Ensembl using free-form search terms.
- *gget info*: Fetch extensive gene or transcript metadata from Ensembl, UniProt, and NCBI by Ensembl ID.
- *gget seq*: Fetch nucleotide or amino acid sequences of genes or transcripts from Ensembl or UniProt by Ensembl ID.
- *gget blast*: BLAST (Altschul *et al.*, 1990, 1997) a nucleotide or amino acid sequence to any BLAST database.
- *gget blat*: Find the genomic location of a nucleotide or amino acid sequence using BLAT (James Kent, 2002).
- *gget muscle*: Align multiple nucleotide or amino acid sequences to each other using the Muscle5 algorithm (Edgar, 2021).
- *gget enrichr*: Perform an enrichment analysis on a list of genes using Enrichr (Chen *et al.*, 2013; Xie *et al.*, 2021; Kuleshov *et al.*, 2016) and an extensive collection of gene set libraries, including KEGG (Kanehisa and Goto, 2000; Kanehisa, 2019; Kanehisa *et al.*, 2021) and Gene Ontology (Ashburner *et al.*, 2000; Gene Ontology Consortium, 2021).

- *gget archs4*: Find the most correlated genes to a gene of interest or find the gene's tissue expression atlas using ARCHS4 (Lachmann *et al.*, 2018).

Each *gget* tool accesses data stored in one or several public databases, as depicted in Figure 1. *gget* fetches the requested data in real-time, guaranteeing that each query will return the latest information. One exception is *gget muscle*, which locally compiles the Muscle5 algorithm (Edgar, 2021) and therefore does not require an internet connection.

*gget info* combines information from Ensembl, NCBI, and UniProt (Cunningham *et al.*, 2022; NCBI Resource Coordinators, 2013; UniProt Consortium, 2021) to provide the user with a comprehensive executive summary of the available information about a gene or transcript. This also enables users to assert whether data from different sources are consistent.

By accessing the NCBI server (NCBI Resource Coordinators, 2013) through HTTP requests, *gget blast* does not require the download of a reference BLAST database, as is the case with existing BLAST tools (Buchfink *et al.*, 2021; Camacho *et al.*, 2009). The whole self-contained *gget* package is approximately 3 MB after installation.

The package dependencies were carefully chosen and kept to a minimum. *gget* depends on the HTML parser *beautifulsoup4* (Richardson, 2022), the Python MySQL-connector (Oracle, 2022), and the HTTP library *requests* (Reitz, 2022). All of these are well-established packages for server interaction in Python. *gget* has been tested on Linux/Unix, Mac OS (Darwin), and Windows.

## Usage and documentation

*gget* can be installed from the command line by running 'pip install gget'. Figure 1 depicts one use case for each *gget* tool with the corresponding output.

Each *gget* tool features an extensive manual available as function documentation in a Python environment or as standard output using the help flag [-h] in the command line. The complete manual with examples can be viewed in the *gget* repository, available at <https://github.com/pachterlab/gget>. A separate *gget examples* repository is accessible at [https://github.com/pachterlab/gget\\_examples](https://github.com/pachterlab/gget_examples) and includes exemplary workflows immediately executable in Google Colaboratory (Bisong, 2019).

## Discussion

Our open-source Python and command-line program *gget* enables efficient and easy programmatic access to information stored in a diverse collection of large, public genomic reference databases. *gget* works alongside existing tools that fetch user-generated sequencing data (Gálvez-Merchán *et al.*, 2022) to replace ineffective, error-prone manual web access during genomic data analysis. While the *gget* modules were motivated by experience with tedious single-cell RNA-seq data analysis tasks (Supplementary Figure 1), we anticipate their utility for a wide range of bioinformatics tasks.

## Acknowledgments

We thank Kyung Hoi (Joseph) Min for advice on the command-line interface, Matteo Guareschi for advice on Windows operability, and A. Sina Boeshaghi, Kristján Eldjárn Hjörleifsson, and Ángel Gálvez-Merchán for insightful discussions about *gget*. Illustrations in Figure 1 and Supplementary Figure 1 were created with BioRender.com. Thanks to the wonderful staff at Dash Coffee Bar in Pasadena, who occasionally gave LL free banana bread to sustain this work.

## Funding

LL was supported by funding from the Biology and Bioengineering Division at the California Institute of Technology and the Chen Graduate Innovator Grant CHEN.SYS3.CGIAFY21. LP was supported in part by NIH U19MH114830.

*Conflict of Interest*: none declared.

## References

- Altschul,S.F. *et al.* (1990) Basic local alignment search tool. *J. Mol. Biol.*, **215**, 403–410.
- Altschul,S.F. *et al.* (1997) Gapped BLAST and PSI-BLAST: a new generation of protein database search programs. *Nucleic Acids Res.*, **25**, 3389–3402.
- Ashburner,M. *et al.* (2000) Gene ontology: tool for the unification of biology. The Gene Ontology Consortium. *Nat. Genet.*, **25**, 25–29.
- Birney,E. *et al.* (2004) An overview of Ensembl. *Genome Res.*, **14**, 925–928.
- Bisong,E. (2019) Google Colaboratory. *Building Machine Learning and Deep Learning Models on Google Cloud Platform*, 59–64.
- Buchfink,B. *et al.* (2021) Sensitive protein alignments at tree-of-life scale using DIAMOND. *Nat. Methods*, **18**, 366–368.
- Camacho,C. *et al.* (2009) BLAST+: architecture and applications. *BMC Bioinformatics*, **10**, 421.
- Chen,E.Y. *et al.* (2013) Enrichr: interactive and collaborative HTML5 gene list enrichment analysis tool. *BMC Bioinformatics*, **14**, 128.
- Cunningham,F. *et al.* (2022) Ensembl 2022. *Nucleic Acids Res.*, **50**, D988–D995.
- Durinck,S. *et al.* (2005) BioMart and Bioconductor: a powerful link between biological databases and microarray data analysis. *Bioinformatics*, **21**, 3439–3440.
- Edgar,R.C. (2021) MUSCLE v5 enables improved estimates of phylogenetic tree confidence by ensemble bootstrapping. *bioRxiv*.
- Etzold,T. *et al.* (1996) [8] SRS: Information retrieval system for molecular biology data banks. In, *Methods in Enzymology*. Academic Press, pp. 114–128.
- Gálvez-Merchán,Á. *et al.* (2022) Metadata retrieval from genomics database with ffq. *bioRxiv*, 2022.05.18.492548.
- Gene Ontology Consortium (2021) The Gene Ontology resource: enriching a GOLD mine. *Nucleic Acids Res.*, **49**, D325–D334.
- James Kent,W. (2002) BLAT—The BLAST-Like Alignment Tool. *Genome Res.*, **12**, 656–664.
- Kanehisa,M. *et al.* (2021) KEGG: integrating viruses and cellular organisms. *Nucleic Acids Res.*, **49**, D545–D551.
- Kanehisa,M. (2019) Toward understanding the origin and evolution of cellular organisms. *Protein Sci.*, **28**, 1947–1951.
- Kanehisa,M. and Goto,S. (2000) KEGG: kyoto encyclopedia of genes and genomes. *Nucleic Acids Res.*, **28**, 27–30.
- Kasprzyk,A. *et al.* (2004) EnsMart: a generic system for fast and flexible access to biological data. *Genome Res.*, **14**, 160–169.
- Kuleshov,M.V. *et al.* (2016) Enrichr: a comprehensive gene set enrichment analysis web server 2016 update. *Nucleic Acids Res.*, **44**, W90–7.
- Lachmann,A. *et al.* (2018) Massive mining of publicly available RNA-seq data from human and mouse. *Nat. Commun.*, **9**, 1366.
- NCBI Resource Coordinators (2013) Database resources of the National Center for Biotechnology Information. *Nucleic Acids Res.*, **41**, D8–D20.
- Oracle (2022) mysql-connector-python 8.0.29.
- Oracle Corporation (1995) MySQL <https://www.mysql.com/>.
- Reitz,K. (2022) requests 2.27.1.
- Richardson,L. (2022) beautifulsoup4 4.11.1.
- de Ruyter,J. (2016) PyBiomart 0.2.0 <https://jrderuyter.github.io/pybiomart/>.
- Stalker,J. *et al.* (2004) The Ensembl Web site: mechanics of a genome browser. *Genome Res.*, **14**, 951–955.
- UniProt Consortium (2021) UniProt: the universal protein knowledgebase in 2021. *Nucleic Acids Res.*, **49**, D480–D489.
- Xie,Z. *et al.* (2021) Gene Set Knowledge Discovery with Enrichr. *Curr Protoc*, **1**, e90.
- Zdobnov,E.M. *et al.* (2002) The EBI SRS server—recent developments. *Bioinformatics*, **18**, 368–373.
